# Supplementary material
Source: publisher site journal article supplement (https://www.dovepress.com/article/452505)
Supplement: Supplementary file 1 [file get_supplementary_file.php]

Table S1 Clinical characteristics of HCC patients involved in the study

|  | TCGA cohort  (N=342) | ICGC cohort  (N=227) | GSE14520 cohort  (N=214) |
| --- | --- | --- | --- |
| Gender Male | 233 | 61 | 185 |
| Female | 109 | 166 | 29 |
| Age ≤60 years | 165 | 49 | 176 |
| >60 years | 177 | 178 | 38 |
| Grade G1/2 | 214 |  |  |
| G3/4 | 123 |  |  |
| unknown | 5 |  |  |
| TNM Stage I/II | 238 | 140 | 165 |
| III/IV | 83 | 87 | 49 |
| unknown | 21 | 0 | 0 |
| Vascular Invasion Yes | 101 |  |  |
| No | 187 |  |  |
| unknown | 54 |  |  |
| Recurrence With tumor | 122 |  | 119 |
| Tumor free | 153 |  | 95 |
| unknown | 67 |  |  |
| Cirrhosis With | 65 |  | 196 |
| Without | 134 |  | 18 |
| unknown | 143 |  | 0 |
| HBV or HCV Infection |  |  |  |
| Yes | 141 |  | 208 |
| No | 161 |  | 6 |
| unknown | 40 |  | 0 |
